# Supplementary material
Source: ML conference proceedings conference paper supplement (https://openreview.net/forum?id=h0ZfDIrj7T)

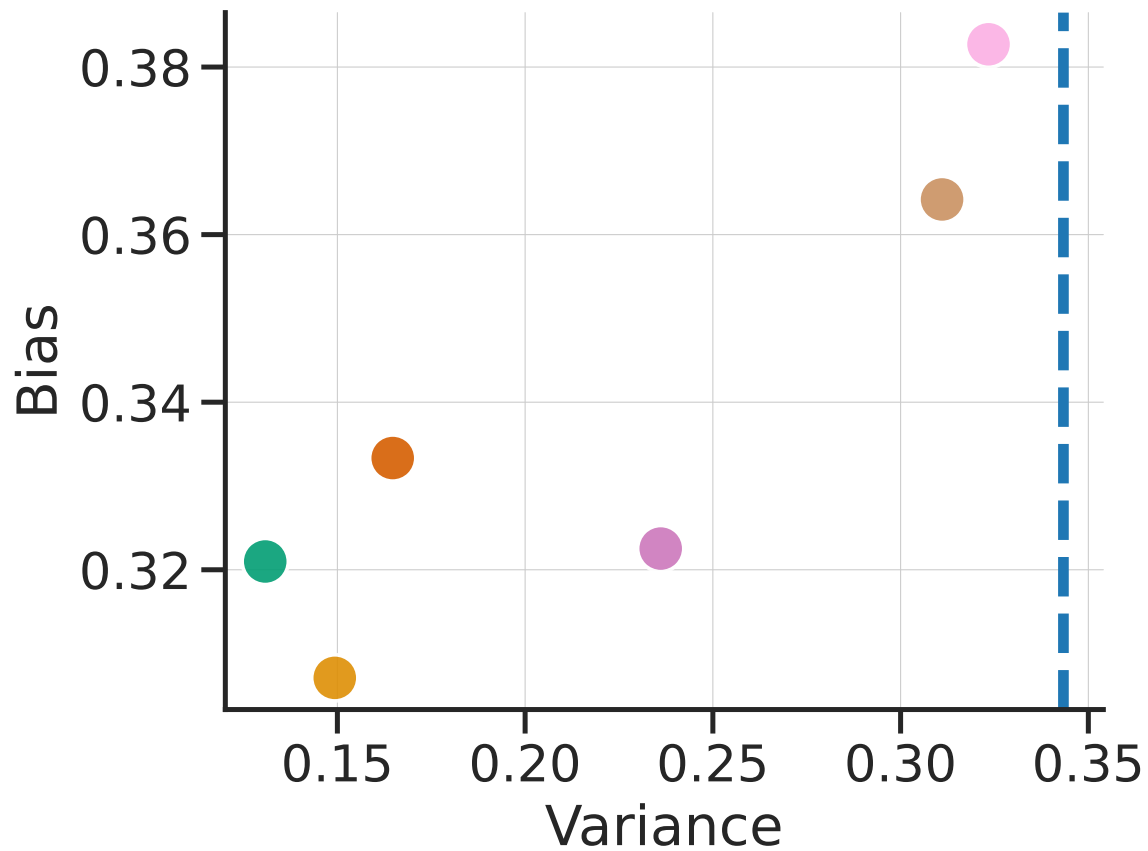

### Annotator

- gpt4 b1
- gpt4
- claude
- gpt3
- guanaco 33
- chatgpt

Supplement: supplementary_material [file attachment]
